# Supplementary material
Source: Springer Nature journal article supplement (https://www.springermedizin.de/resource/supplementary/12943_2010_801_MOESM6_ESM.pdf/9554864)

**A**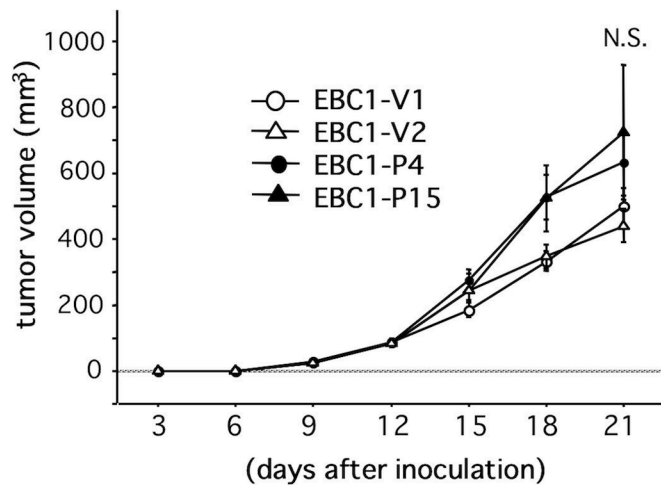**B**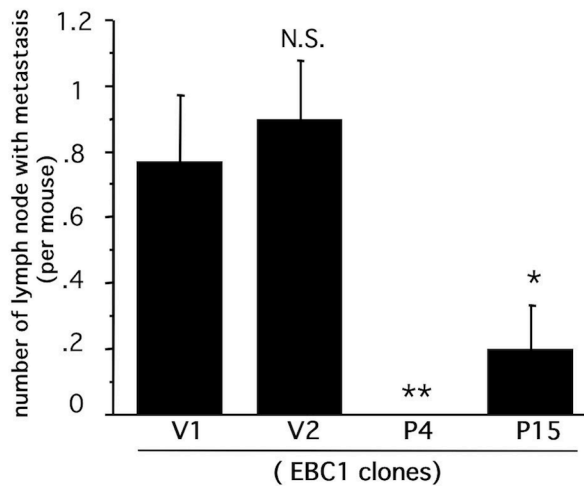**C**

lymph node with metastatic focus

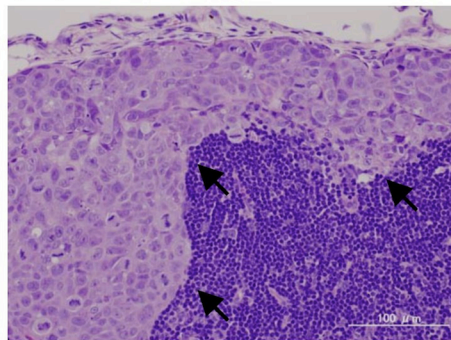

Supplement: MOESM6 [file 9554864]
